# Supplementary material for: Synthesis of Ni-Doped Tremolite Fibers to Help Clarify the Aetiology of the Cytotoxic Outcome of Asbestos
Source: MDPI journal article supplement (doi:10.3390/nano13081303), 2023-04-07
Supplement: s1 [file s1]

Supplementary Materials

# Synthesis of Ni-Doped Tremolite Fibers to Help Clarify the Aetiology of the Cytotoxic Outcome of Asbestos

Andrea Bloise <sup>1,2,\*</sup>, Eugenia Giorno <sup>3</sup>, Domenico Miriello <sup>1</sup> and Nicolas Godbert <sup>3</sup>

<sup>1</sup> Department of Biology, Ecology and Earth Sciences, University of Calabria, 87036 Rende (CS), Italy;

<sup>2</sup> University Museum System—SiMU, section of Mineralogy and Petrography, University of Calabria, 87036 Arcavacata di Rende (CS), Italy

<sup>3</sup> MAT-INLab Laboratory of Inorganic Molecular Materials, Department of Chemistry and Chemical Technologies, University of Calabria 87036 Rende (CS), Italy

\* Correspondence: andrea.bloise@unical.it

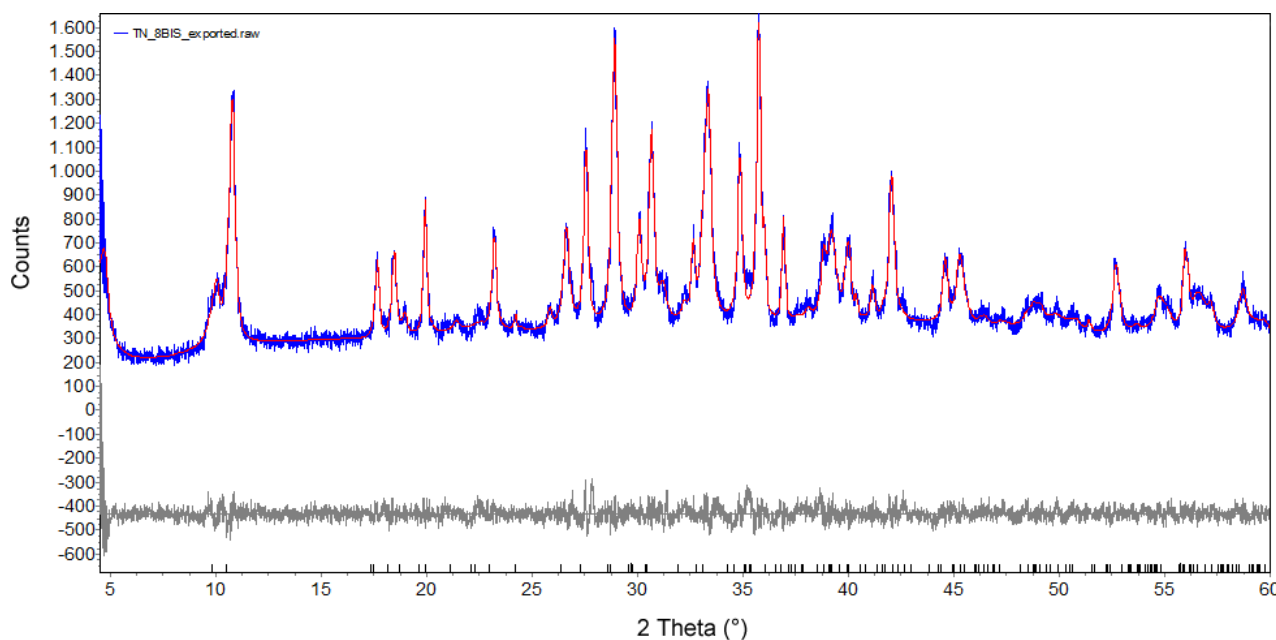

**Figure S1.** Conventional Rietveld plots of Ni-doped tremolite run TN8. Blue dots: experimental pattern; continuous red line: calculated pattern; continuous grey line: difference plot. Black vertical bars represent the position of Bragg reflection of tremolite. Agreement factor  $R_{wp} = 6.7$ .

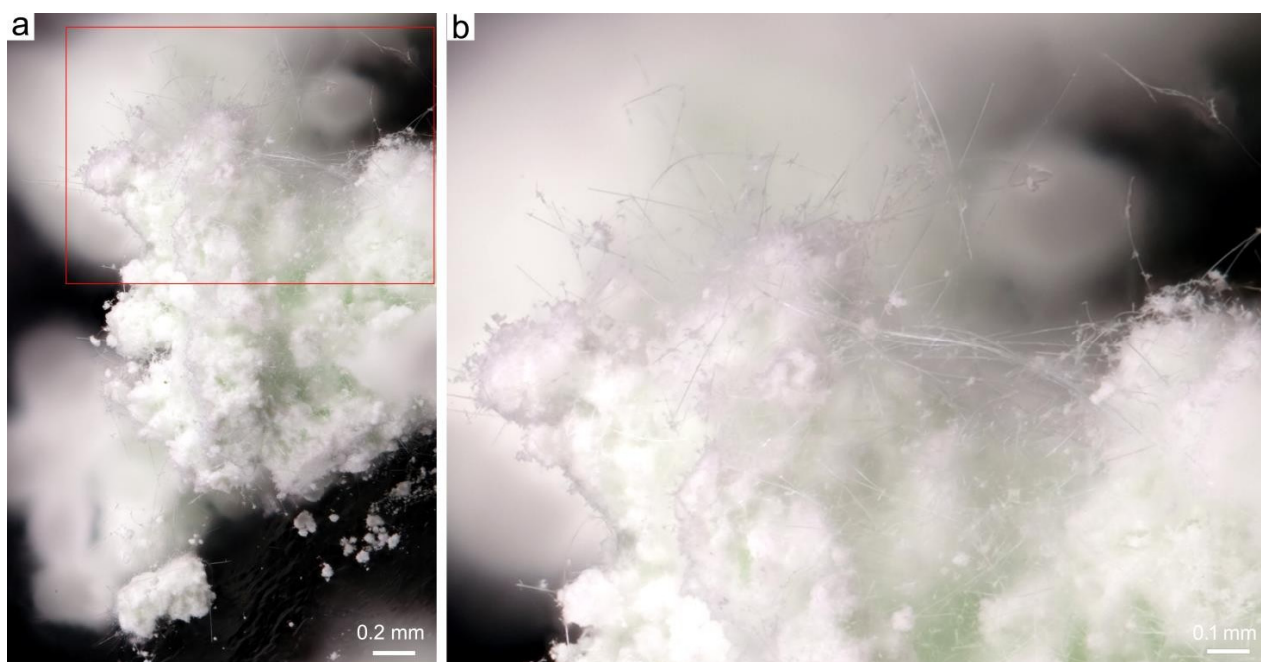

**Figure S2.** (a) optical image of white fibers of Ni-doped tremolite run TN8, (b) enlargement of the red square of figure a. Measurements on Ni-doped tremolite fibers were carried out using OPTIKA PROView image analysis software.

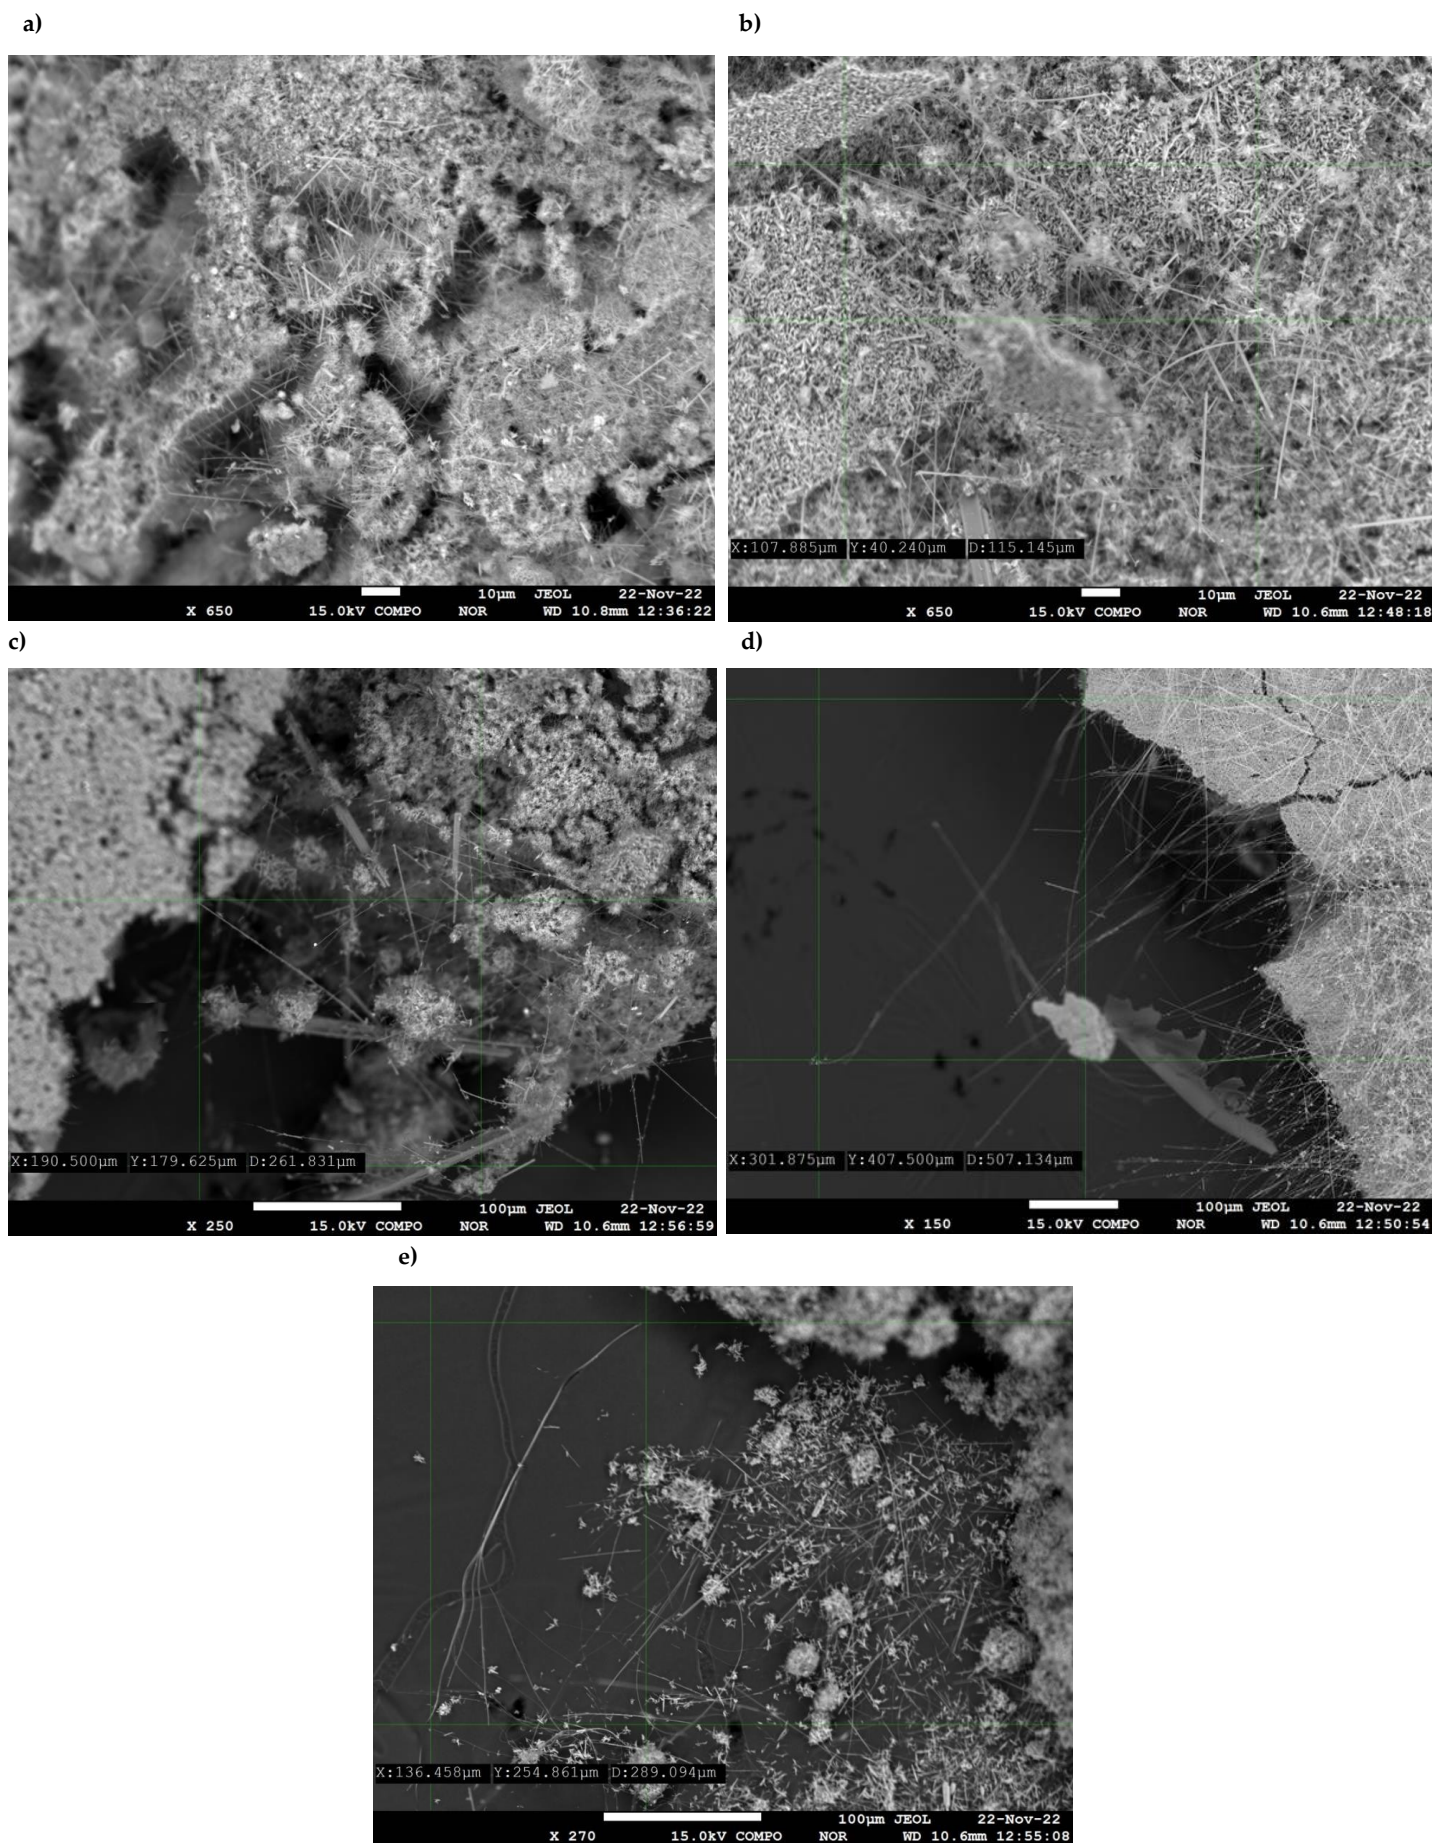

Figure S3. SEM images of Ni-doped tremolite. Selected representative images only a) run TN3, b) .run TN4 , c) run TN5, d) run TN6, e) TN7



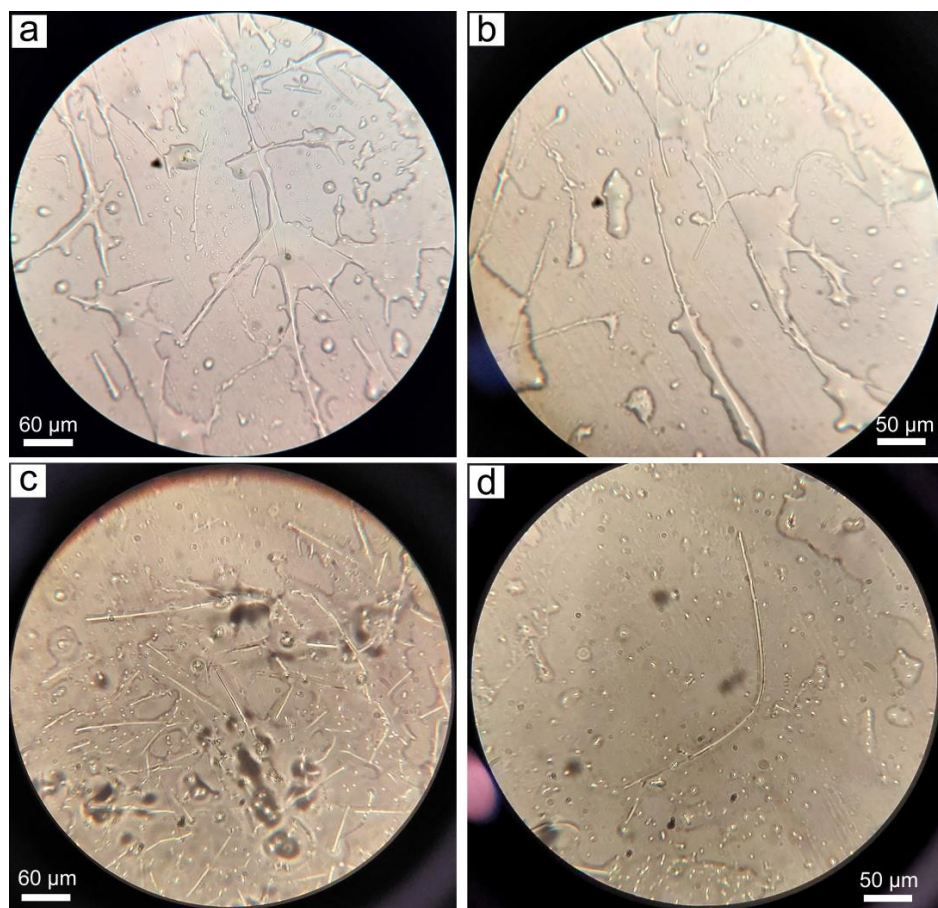

**Figure S4.** Selected MOCF images of the synthesized runs (a-b) Ni-doped tremolite fibers in liquid with refractive index of 1.615 (without phase contrast vision), (c-d) Ni-doped tremolite in liquid with refractive index of 1.615 (phase contrast vision).

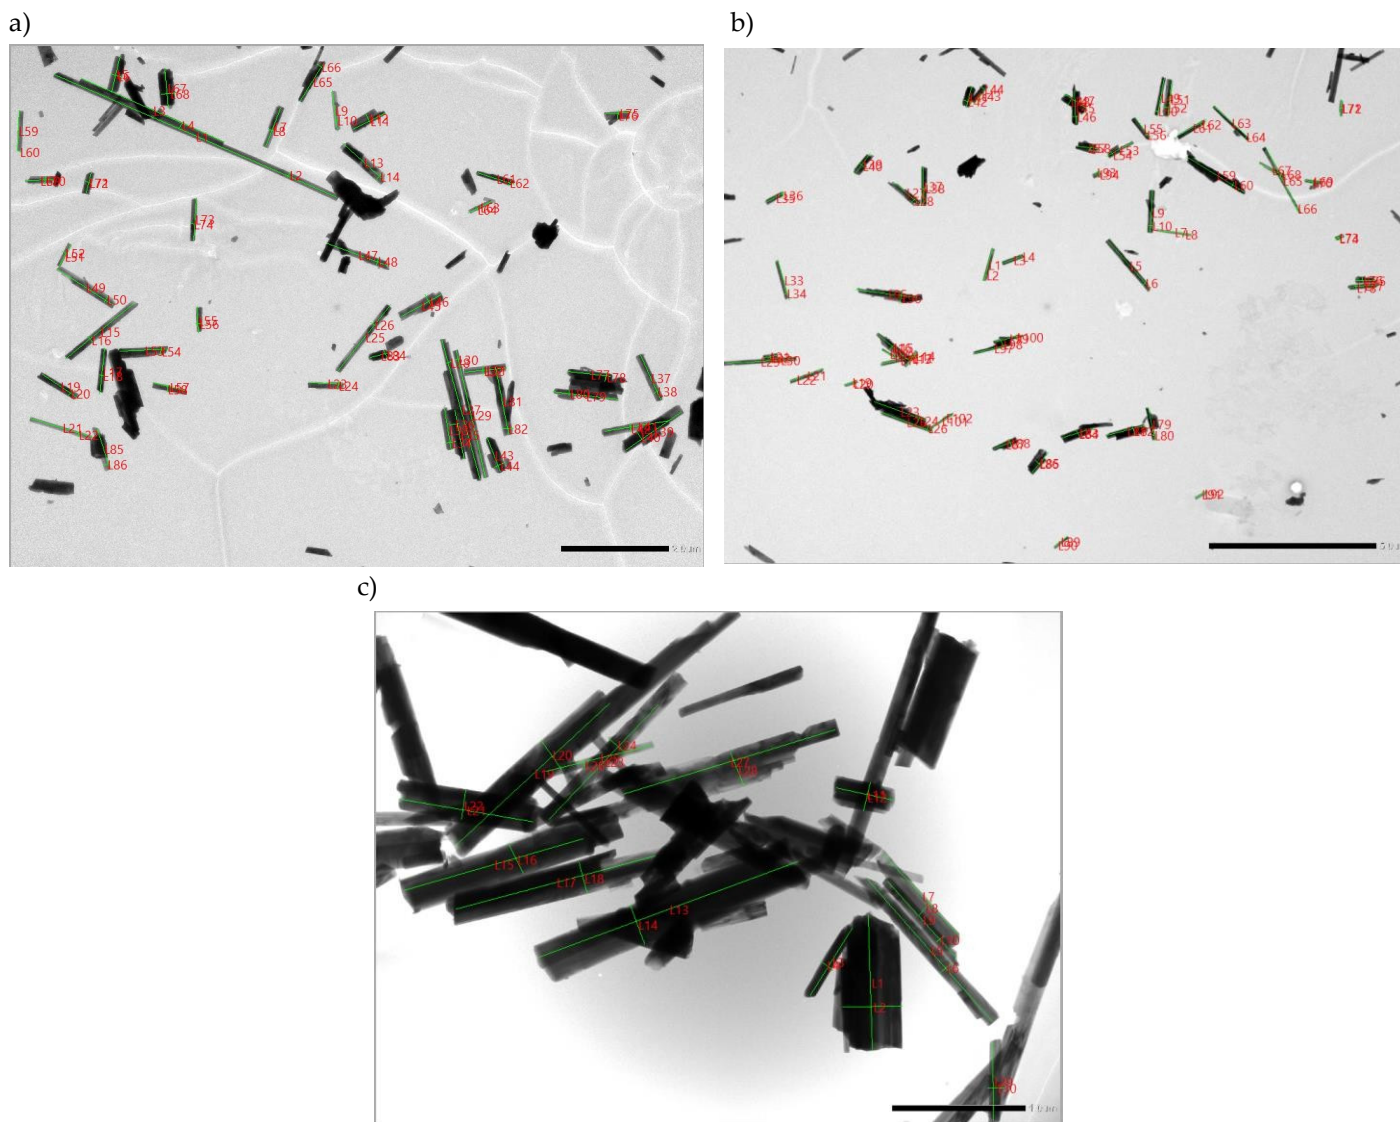

**Figure S5.** Example of TEM images of Ni-doped tremolite run TN8. Low magnification a) and b). High magnification c)  
 Note, only width measurements have been used in this paper (see excel supplementary materials). Measurements on Ni-doped tremolite fibers were carried out using OPTIKA PROView image analysis software. Please note, the magnification at which the widths were measured is not the one shown in the following images (show as an example only).

**Excel S6.** measured widths by TEM images for all runs.

| TN2     |                |            | TN3     |                |            |
|---------|----------------|------------|---------|----------------|------------|
| measure | coordinates    | width (μm) | measure | coordinates    | width (μm) |
| L1      | (21.91, 16.82) | 0,46       | L1      | (30.98, 36.86) | 0,39       |
| L2      | (22.58, 17.86) | 0,24       | L2      | (25.14, 35.83) | 0,23       |
| L3      | (22.30, 19.18) | 0,35       | L3      | (34.18, 30.25) | 0,24       |
| L4      | (25.78, 18.04) | 0,24       | L4      | (48.49, 44.83) | 0,22       |
| L5      | (16.16, 18.11) | 0,53       | L5      | (43.94, 50.77) | 0,28       |
| L6      | (16.94, 26.32) | 0,38       | L6      | (53.84, 48.79) | 0,41       |
| L7      | (27.62, 23.52) | 0,13       | L7      | (66.12, 46.34) | 0,4        |
| L8      | (29.13, 20.09) | 0,15       | L8      | (67.21, 44.10) | 0,28       |
| L9      | (31.06, 16.42) | 0,12       | L9      | (69.97, 44.93) | 0,23       |
| L10     | (38.58, 13.46) | 0,15       | L10     | (70.69, 43.90) | 0,34       |
| L11     | (39.79, 14.82) | 0,15       | L11     | (72.14, 42.07) | 0,2        |
| L12     | (39.71, 18.26) | 0,34       | L12     | (72.46, 41.00) | 0,29       |
| L13     | (41.03, 19.77) | 0,18       | L13     | (73.09, 39.63) | 0,16       |
| L14     | (49.65, 17.40) | 0,12       | L14     | (68.92, 38.75) | 0,41       |
| L15     | (48.12, 15.23) | 0,2        | L15     | (68.72, 39.96) | 0,14       |
| L16     | (46.74, 12.48) | 0,15       | L16     | (65.82, 38.59) | 0,29       |
| L17     | (34.81, 11.73) | 0,25       | L17     | (66.47, 36.17) | 0,27       |
| L18     | (34.93, 13.36) | 0,12       | L18     | (66.53, 35.33) | 0,18       |
| L19     | (34.21, 13.21) | 0,17       | L19     | (65.84, 34.54) | 0,09       |
| L20     | (32.40, 13.53) | 0,27       | L20     | (61.84, 31.70) | 0,2        |
| L21     | (31.44, 11.66) | 0,24       | L21     | (61.64, 31.42) | 0,09       |
| L22     | (23.34, 11.16) | 0,15       | L22     | (57.71, 29.75) | 0,04       |
| L23     | (22.77, 10.28) | 0,21       | L23     | (58.43, 28.62) | 0,08       |
| L24     | (15.78, 13.86) | 0,27       | L24     | (65.40, 31.66) | 0,17       |
| L25     | (8.09, 32.40)  | 0,29       | L25     | (66.45, 32.95) | 0,11       |
| L26     | (6.74, 32.29)  | 0,19       | L26     | (69.67, 32.11) | 0,33       |
| L27     | (8.58, 30.87)  | 0,21       | L27     | (73.91, 31.36) | 0,2        |
| L28     | (9.08, 30.00)  | 0,18       | L28     | (73.39, 30.44) | 0,2        |
| L29     | (16.50, 33.86) | 0,17       | L29     | (41.83, 42.75) | 0,13       |
| L30     | (17.70, 29.82) | 0,12       | L30     | (41.81, 42.23) | 0,09       |
| L31     | (13.96, 27.58) | 0,15       | L31     | (42.23, 41.91) | 0,06       |
| L32     | (10.21, 24.75) | 0,17       | L32     | (42.11, 41.35) | 0,06       |
| L33     | (9.99, 23.08)  | 0,23       | L33     | (42.41, 40.90) | 0,11       |
| L34     | (10.79, 22.05) | 0,13       | L34     | (41.69, 40.94) | 0,08       |
| L35     | (5.40, 23.89)  | 0,11       | L35     | (42.17, 39.55) | 0,16       |
| L36     | (5.32, 21.64)  | 0,19       | L36     | (40.02, 40.84) | 0,16       |
| L37     | (8.97, 17.45)  | 0,24       | L37     | (39.63, 41.28) | 0,09       |
| L38     | (26.66, 26.85) | 0,16       | L38     | (39.23, 42.21) | 0,11       |
| L39     | (33.36, 29.77) | 0,11       | L39     | (48.01, 45.53) | 0,29       |
| L40     | (35.94, 29.02) | 0,25       | L40     | (40.08, 47.00) | 0,06       |

|     |                |      |     |                |      |
|-----|----------------|------|-----|----------------|------|
| L41 | (35.78, 32.73) | 0,21 | L41 | (38.73, 45.05) | 0,13 |
| L42 | (34.88, 32.32) | 0,21 | L42 | (36.61, 42.75) | 0,09 |
| L43 | (47.82, 32.38) | 0,33 | L43 | (35.67, 41.47) | 0,2  |
| L44 | (48.67, 28.91) | 0,24 | L44 | (33.88, 41.85) | 0,2  |
| L45 | (49.47, 26.64) | 0,29 | L45 | (33.01, 41.99) | 0,13 |
| L46 | (53.78, 25.07) | 0,21 | L46 | (33.39, 43.32) | 0,11 |
| L47 | (50.43, 24.05) | 0,18 | L47 | (34.68, 43.74) | 0,2  |
| L48 | (53.14, 21.26) | 0,13 | L48 | (34.08, 44.34) | 0,13 |
| L49 | (53.74, 20.50) | 0,09 | L49 | (34.50, 45.41) | 0,14 |
| L50 | (52.51, 16.42) | 0,12 | L50 | (35.93, 47.73) | 0,24 |
| L51 | (51.45, 16.73) | 0,25 | L51 | (38.14, 47.30) | 0,09 |
| L52 | (51.96, 13.81) | 0,12 | L52 | (39.45, 48.89) | 0,14 |
| L53 | (51.57, 13.37) | 0,11 | L53 | (42.21, 49.09) | 0,08 |
| L54 | (53.84, 11.96) | 0,17 | L54 | (45.83, 48.45) | 0,11 |
| L55 | (54.50, 13.48) | 0,15 | L55 | (47.32, 48.31) | 0,13 |
| L56 | (55.10, 15.72) | 0,21 | L56 | (49.30, 48.35) | 0,13 |
| L57 | (55.85, 17.86) | 0,19 | L57 | (51.35, 47.87) | 0,12 |
| L58 | (53.74, 22.05) | 0,09 | L58 | (48.71, 49.38) | 0,17 |
| L59 | (51.89, 22.10) | 0,09 | L59 | (35.85, 54.79) | 0,21 |
| L60 | (50.07, 19.91) | 0,27 | L60 | (35.10, 54.81) | 0,08 |
| L61 | (45.63, 20.18) | 0,21 | L61 | (35.71, 54.07) | 0,06 |
| L62 | (46.04, 18.71) | 0,23 | L62 | (37.56, 52.82) | 0,08 |
| L63 | (45.97, 17.92) | 0,19 | L63 | (37.98, 51.73) | 0,13 |
| L64 | (47.64, 38.77) | 0,28 | L64 | (41.06, 52.80) | 0,21 |
| L65 | (50.59, 37.65) | 0,21 | L65 | (43.58, 54.03) | 0,13 |
| L66 | (53.96, 36.20) | 0,21 | L66 | (42.83, 54.45) | 0,09 |
| L67 | (50.66, 33.72) | 0,12 | L67 | (33.92, 45.71) | 0,04 |
| L68 | (45.70, 35.01) | 0,21 | L68 | (33.31, 45.07) | 0,11 |
| L69 | (43.58, 38.71) | 0,26 | L69 | (32.57, 42.96) | 0,04 |
| L70 | (39.97, 39.38) | 0,18 | L70 | (31.64, 44.10) | 0,12 |
| L71 | (39.21, 39.30) | 0,13 | L71 | (31.50, 44.53) | 0,06 |
| L72 | (37.39, 39.03) | 0,13 | L72 | (30.90, 45.27) | 0,09 |
| L73 | (36.22, 39.40) | 0,15 | L73 | (29.51, 44.44) | 0,09 |
| L74 | (34.40, 38.17) | 0,07 | L74 | (43.34, 44.20) | 0,09 |
| L75 | (33.90, 37.79) | 0,03 | L75 | (42.19, 44.28) | 0,14 |
| L76 | (31.07, 35.60) | 0,11 | L76 | (46.01, 44.46) | 0,06 |
| L77 | (31.96, 39.35) | 0,21 | L77 | (47.65, 44.24) | 0,08 |
| L78 | (34.19, 40.98) | 0,15 | L78 | (39.96, 55.60) | 0,12 |
| L79 | (36.70, 40.78) | 0,15 | L79 | (41.57, 55.48) | 0,11 |
| L80 | (39.88, 40.78) | 0,18 | L80 | (45.19, 55.64) | 0,08 |
| L81 | (42.60, 40.91) | 0,16 | L81 | (47.69, 54.75) | 0,09 |
| L82 | (49.18, 36.20) | 0,21 | L82 | (47.77, 54.23) | 0,04 |
| L83 | (51.61, 29.79) | 0,17 | L83 | (49.24, 54.89) | 0,11 |
| L84 | (54.11, 27.96) | 0,15 | L84 | (50.75, 54.53) | 0,08 |
| L85 | (24.77, 34.68) | 0,15 | L85 | (50.42, 53.26) | 0,04 |
| L86 | (24.81, 37.27) | 0,13 | L86 | (48.93, 52.19) | 0,08 |
| L87 | (24.21, 38.42) | 0,12 | L87 | (48.01, 52.36) | 0,09 |
| L88 | (24.52, 39.50) | 0,13 | L88 | (47.75, 52.40) | 0,06 |
| L89 | (26.48, 40.50) | 0,13 | L89 | (46.70, 53.38) | 0,08 |
| L90 | (28.62, 40.56) | 0,19 | L90 | (46.38, 52.94) | 0,11 |

|      |                |      |      |                |      |
|------|----------------|------|------|----------------|------|
| L91  | (29.77, 32.24) | 0,15 | L91  | (45.87, 52.44) | 0,09 |
| L92  | (28.48, 29.78) | 0,19 | L92  | (7.55, 50.70)  | 0,09 |
| L93  | (29.35, 28.62) | 0,12 | L93  | (8.45, 49.42)  | 0,38 |
| L94  | (35.72, 3.96)  | 0,24 | L94  | (12.58, 49.64) | 0,39 |
| L95  | (40.81, 5.82)  | 0,22 | L95  | (12.04, 48.79) | 0,16 |
| L96  | (46.58, 6.47)  | 0,21 | L96  | (14.65, 48.61) | 0,2  |
| L97  | (51.96, 6.09)  | 0,23 | L97  | (16.65, 46.70) | 0,16 |
| L98  | (50.28, 8.39)  | 0,15 | L98  | (19.38, 46.04) | 0,13 |
| L99  | (49.35, 7.16)  | 0,21 | L99  | (18.68, 50.42) | 0,2  |
| L100 | (55.03, 4.12)  | 0,09 | L100 | (17.71, 50.68) | 0,16 |
| L101 | (46.01, 1.94)  | 0,19 | L101 | (16.51, 51.41) | 0,13 |
| L102 | (31.88, 2.42)  | 0,09 | L102 | (16.28, 51.95) | 0,16 |
| L103 | (27.68, 2.38)  | 0,17 | L103 | (14.65, 52.68) | 0,23 |
| L104 | (27.76, 4.60)  | 0,15 | L104 | (13.87, 53.00) | 0,27 |
| L105 | (24.03, 3.23)  | 0,21 | L105 | (10.31, 54.09) | 0,12 |
| L106 | (20.91, 3.26)  | 0,19 | L106 | (9.50, 54.23)  | 0,27 |
| L107 | (44.08, 0.62)  | 0,18 | L107 | (8.13, 51.73)  | 0,13 |
| L108 | (45.94, 1.14)  | 0,15 | L108 | (7.43, 51.79)  | 0,24 |
| L109 | (50.75, 2.39)  | 0,09 | L109 | (7.07, 52.23)  | 0,22 |
| L110 | (20.98, 10.07) | 0,22 | L110 | (5.64, 50.38)  | 0,2  |
| L111 | (20.18, 12.96) | 0,21 | L111 | (6.34, 47.52)  | 0,13 |
| L112 | (16.95, 11.39) | 0,15 | L112 | (6.40, 46.70)  | 0,16 |
| L113 | (35.51, 10.78) | 0,16 | L113 | (9.24, 46.20)  | 0,2  |
| L114 | (37.43, 9.18)  | 0,2  | L114 | (10.69, 45.95) | 0,22 |
| L115 | (37.43, 8.20)  | 0,09 | L115 | (11.59, 46.44) | 0,13 |
| L116 | (42.99, 14.00) | 0,12 | L116 | (12.54, 46.48) | 0,17 |
| L117 | (21.74, 39.94) | 0,16 | L117 | (13.06, 45.65) | 0,13 |
| L118 | (15.26, 39.19) | 0,15 | L118 | (3.97, 41.79)  | 0,16 |
| L119 | (12.07, 39.40) | 0,17 | L119 | (5.98, 41.65)  | 0,14 |
| L120 | (7.24, 35.76)  | 0,19 | L120 | (9.12, 42.15)  | 0,17 |
| L121 | (4.75, 34.85)  | 0,2  | L121 | (11.11, 42.71) | 0,06 |
| L122 | (19.71, 35.21) | 0,24 | L122 | (13.65, 42.89) | 0,2  |
| L123 | (21.47, 35.98) | 0,19 | L123 | (12.12, 44.28) | 0,18 |
| L124 | (22.46, 37.68) | 0,06 | L124 | (11.74, 44.42) | 0,13 |
| L125 | (20.35, 37.64) | 0,16 | L125 | (4.77, 46.22)  | 0,11 |
| L126 | (25.57, 36.82) | 0,15 | L126 | (1.71, 43.82)  | 0,09 |
| L127 | (23.62, 33.21) | 0,09 | L127 | (1.97, 42.17)  | 0,14 |
| L128 | (25.06, 31.30) | 0,15 | L128 | (1.57, 45.39)  | 0,2  |
| L129 | (23.05, 30.48) | 0,09 | L129 | (3.97, 46.82)  | 0,18 |
| L130 | (27.01, 28.33) | 0,18 | L130 | (4.99, 48.65)  | 0,2  |
| L131 | (32.30, 24.63) | 0,21 | L131 | (5.94, 49.22)  | 0,06 |
| L132 | (46.39, 24.72) | 0,12 | L132 | (2.33, 39.90)  | 0,12 |
| L133 | (46.80, 23.74) | 0,18 | L133 | (3.48, 39.86)  | 0,12 |
| L134 | (43.80, 23.14) | 0,23 | L134 | (5.13, 40.38)  | 0,08 |
| L135 | (41.51, 23.23) | 0,16 | L135 | (6.86, 40.88)  | 0,13 |
| L136 | (40.37, 23.34) | 0,11 | L136 | (9.56, 39.98)  | 0,2  |
| L137 | (34.13, 9.24)  | 0,24 | L137 | (14.21, 40.44) | 0,06 |
| L138 | (33.93, 10.28) | 0,34 | L138 | (15.52, 39.94) | 0,12 |
| L139 | (32.35, 9.84)  | 0,12 | L139 | (17.47, 40.36) | 0,13 |
| L140 | (29.55, 8.83)  | 0,12 | L140 | (19.81, 42.81) | 0,09 |



|      |                |      |      |                |      |
|------|----------------|------|------|----------------|------|
| L141 | (26.66, 7.61)  | 0,21 | L141 | (20.45, 43.36) | 0,2  |
| L142 | (32.48, 6.66)  | 0,23 | L142 | (21.30, 43.76) | 0,24 |
| L143 | (31.88, 6.11)  | 0,09 | L143 | (20.75, 44.87) | 0,08 |
| L144 | (33.93, 4.15)  | 0,09 | L144 | (20.05, 45.05) | 0,13 |
| L145 | (36.66, 2.80)  | 0,21 | L145 | (16.93, 44.83) | 0,18 |
| L146 | (46.13, 7.48)  | 0,21 | L146 | (22.58, 52.68) | 0,14 |
| L147 | (48.45, 8.01)  | 0,12 | L147 | (23.39, 53.20) | 0,13 |
| L148 | (53.24, 8.52)  | 0,17 | L148 | (24.64, 53.46) | 0,11 |
| L149 | (55.87, 5.43)  | 0,13 | L149 | (25.77, 53.85) | 0,14 |
| L150 | (55.88, 2.18)  | 0,21 | L150 | (26.31, 50.89) | 0,16 |
| L151 | (3.94, 24.85)  | 0,17 | L151 | (22.28, 49.40) | 0,14 |
| L152 | (5.88, 24.97)  | 0,15 | L152 | (21.48, 48.97) | 0,2  |
| L153 | (2.96, 35.97)  | 0,21 | L153 | (20.51, 50.12) | 0,18 |
| L154 | (2.17, 36.69)  | 0,12 | L154 | (19.97, 51.91) | 0,14 |
| L155 | (2.23, 35.65)  | 0,15 | L155 | (20.11, 53.22) | 0,08 |
| L156 | (1.80, 38.27)  | 0,09 | L156 | (19.79, 53.74) | 0,11 |
| L157 | (3.97, 39.43)  | 0,27 | L157 | (19.50, 53.87) | 0,06 |
| L158 | (6.98, 39.71)  | 0,12 | L158 | (19.38, 54.99) | 0,13 |
| L159 | (8.81, 40.38)  | 0,21 | L159 | (19.48, 55.48) | 0,18 |
| L160 | (12.96, 33.70) | 0,23 | L160 | (20.77, 55.52) | 0,09 |
| L161 | (10.69, 31.88) | 0,23 | L161 | (27.56, 52.44) | 0,13 |
| L162 | (22.17, 27.65) | 0,21 | L162 | (29.31, 52.54) | 0,14 |
| L163 | (21.52, 29.74) | 0,33 | L163 | (29.13, 51.91) | 0,08 |
| L164 | (30.48, 34.87) | 0,19 | L164 | (29.69, 51.41) | 0,24 |
| L165 | (38.05, 34.78) | 0,32 | L165 | (30.94, 50.87) | 0,09 |
| L166 | (40.57, 32.79) | 0,09 | L166 | (25.20, 50.75) | 0,11 |
| L167 | (41.28, 30.88) | 0,12 | L167 | (25.18, 48.45) | 0,21 |
| L168 | (41.17, 29.60) | 0,07 | L168 | (26.33, 48.45) | 0,14 |
| L169 | (34.12, 18.17) | 0,15 | L169 | (26.31, 54.73) | 0,11 |
| L170 | (33.04, 17.80) | 0,29 | L170 | (27.05, 55.62) | 0,06 |
| L171 | (35.04, 16.64) | 0,15 | L171 | (25.40, 55.37) | 0,08 |
| L172 | (14.31, 31.51) | 0,12 | L172 | (23.09, 55.44) | 0,11 |
| L173 | (20.70, 33.90) | 0,12 | L173 | (23.37, 54.05) | 0,16 |
| L174 | (22.87, 32.38) | 0,13 | L174 | (23.27, 53.74) | 0,09 |
| L175 | (28.72, 35.73) | 0,09 | L175 | (28.60, 54.83) | 0,06 |
| L176 | (27.76, 30.63) | 0,21 | L176 | (27.84, 54.29) | 0,09 |
| L177 | (27.46, 30.00) | 0,07 | L177 | (30.72, 54.89) | 0,11 |
| L178 | (50.53, 11.03) | 0,19 | L178 | (35.43, 53.42) | 0,12 |
| L179 | (49.91, 12.48) | 0,11 | L179 | (33.74, 52.80) | 0,09 |
| L180 | (49.35, 12.04) | 0,03 | L180 | (34.24, 48.99) | 0,06 |
| L181 | (54.52, 10.38) | 0,06 | L181 | (35.63, 49.72) | 0,12 |
| L182 | (51.99, 7.05)  | 0,16 | L182 | (21.70, 47.30) | 0,08 |
| L183 | (52.58, 4.46)  | 0,18 | L183 | (19.22, 48.95) | 0,17 |
| L184 | (42.83, 2.29)  | 0,12 | L184 | (18.10, 54.69) | 0,14 |
| L185 | (38.87, 1.29)  | 0,11 | L185 | (17.51, 55.68) | 0,2  |
| L186 | (37.79, 0.38)  | 0,4  | L186 | (14.15, 54.07) | 0,09 |
| L187 | (37.55, 1.91)  | 0,2  | L187 | (27.70, 41.93) | 0,08 |
| L188 | (25.32, 0.44)  | 0,09 | L188 | (26.97, 41.93) | 0,14 |
| L189 | (25.32, 1.29)  | 0,07 | L189 | (27.25, 43.66) | 0,13 |
| L190 | (24.47, 1.58)  | 0,21 | L190 | (29.33, 42.98) | 0,16 |

|                |                |             |
|----------------|----------------|-------------|
| L191           | (22.90, 1.47)  | 0,18        |
| L192           | (22.18, 0.72)  | 0,17        |
| L193           | (29.38, 1.41)  | 0,18        |
| L194           | (27.43, 5.13)  | 0,07        |
| L195           | (30.38, 6.26)  | 0,15        |
| L196           | (27.99, 10.41) | 0,25        |
| L197           | (28.59, 11.38) | 0,17        |
| L198           | (27.73, 12.02) | 0,15        |
| L199           | (26.20, 12.13) | 0,15        |
| L200           | (30.79, 13.84) | 0,12        |
| <b>Average</b> |                | <b>0,18</b> |

|                |                |             |
|----------------|----------------|-------------|
| L191           | (30.19, 40.86) | 0,09        |
| L192           | (23.83, 46.54) | 0,09        |
| L193           | (26.69, 46.08) | 0,13        |
| L194           | (34.94, 47.34) | 0,25        |
| L195           | (36.84, 45.71) | 0,08        |
| L196           | (37.04, 43.96) | 0,18        |
| L197           | (35.08, 33.58) | 0,12        |
| L198           | (36.61, 33.56) | 0,09        |
| L199           | (35.04, 37.92) | 0,04        |
| L82            | (27.41, 22.22) | 0,13        |
| <b>Average</b> |                | <b>0,15</b> |

| TN4     |                |            | TN5     |                 |            |
|---------|----------------|------------|---------|-----------------|------------|
| measure | coordinates    | width (μm) | measure | coordinates     | width (μm) |
| L1      | (1.86, 20.25)  | 0,15       | L1      | (114.55, 53.38) | 0,23       |
| L2      | (2.18, 18.24)  | 0,16       | L2      | (116.21, 51.49) | 0,36       |
| L3      | (0.37, 17.17)  | 0,15       | L3      | (117.18, 50.40) | 0,32       |
| L4      | (1.11, 16.24)  | 0,16       | L4      | (120.73, 49.60) | 0,23       |
| L5      | (5.90, 18.13)  | 0,21       | L5      | (120.05, 49.94) | 0,23       |
| L6      | (5.55, 18.24)  | 0,17       | L6      | (121.82, 48.91) | 0,34       |
| L7      | (7.53, 17.34)  | 0,13       | L7      | (120.33, 46.39) | 0,11       |
| L8      | (8.33, 16.82)  | 0,18       | L8      | (117.53, 46.62) | 0,23       |
| L9      | (7.52, 13.38)  | 0,18       | L9      | (114.49, 48.63) | 0,36       |
| L10     | (7.04, 9.68)   | 0,28       | L10     | (100.63, 26.58) | 0,57       |
| L11     | (7.88, 9.90)   | 0,09       | L11     | (106.64, 29.44) | 0,23       |
| L12     | (6.58, 9.09)   | 0,16       | L12     | (108.30, 26.00) | 0,34       |
| L13     | (3.25, 8.12)   | 0,11       | L13     | (115.52, 28.29) | 0,34       |
| L14     | (2.94, 8.03)   | 0,13       | L14     | (118.38, 27.61) | 0,11       |
| L15     | (2.94, 7.25)   | 0,15       | L15     | (118.27, 36.08) | 0,41       |
| L16     | (1.77, 6.87)   | 0,13       | L16     | (133.91, 37.46) | 0,23       |
| L17     | (1.97, 6.56)   | 0,16       | L17     | (132.99, 37.86) | 0,26       |
| L18     | (1.32, 7.26)   | 0,16       | L18     | (137.34, 38.66) | 0,47       |
| L19     | (0.98, 7.29)   | 0,19       | L19     | (132.82, 41.81) | 0,26       |
| L20     | (0.74, 7.73)   | 0,21       | L20     | (127.09, 42.55) | 0,16       |
| L21     | (3.54, 4.83)   | 0,26       | L21     | (123.31, 44.22) | 0,34       |
| L22     | (3.90, 4.45)   | 0,13       | L22     | (121.25, 45.07) | 0,16       |
| L23     | (3.25, 3.99)   | 0,27       | L23     | (111.97, 41.18) | 0,36       |
| L24     | (2.41, 1.80)   | 0,23       | L24     | (109.68, 39.92) | 0,16       |
| L25     | (4.34, 0.48)   | 0,27       | L25     | (108.71, 40.38) | 0,41       |
| L26     | (12.71, 2.32)  | 0,11       | L26     | (102.69, 34.14) | 0,34       |
| L27     | (17.04, 1.32)  | 0,14       | L27     | (97.88, 30.36)  | 0,34       |
| L28     | (18.87, 0.95)  | 0,13       | L28     | (98.74, 32.99)  | 0,23       |
| L29     | (17.53, 2.65)  | 0,15       | L29     | (94.16, 48.45)  | 0,23       |
| L30     | (14.63, 3.05)  | 0,11       | L30     | (94.85, 43.41)  | 0,32       |
| L31     | (14.35, 3.24)  | 0,15       | L31     | (93.93, 44.22)  | 0,23       |
| L32     | (15.21, 8.43)  | 0,13       | L32     | (92.55, 52.18)  | 0,26       |
| L33     | (15.72, 8.93)  | 0,15       | L33     | (105.90, 55.78) | 0,41       |
| L34     | (13.86, 9.16)  | 0,19       | L34     | (88.03, 54.01)  | 0,16       |
| L35     | (13.66, 8.76)  | 0,14       | L35     | (85.68, 49.20)  | 0,62       |
| L36     | (12.19, 8.03)  | 0,13       | L36     | (82.30, 43.59)  | 0,36       |
| L37     | (13.37, 9.79)  | 0,23       | L37     | (85.22, 41.75)  | 0,26       |
| L38     | (15.35, 11.70) | 0,12       | L38     | (77.38, 53.38)  | 0,41       |
| L39     | (16.36, 11.65) | 0,22       | L39     | (76.80, 54.07)  | 0,26       |
| L40     | (13.02, 11.92) | 0,3        | L40     | (74.57, 53.78)  | 0,26       |

|     |                |      |     |                 |      |
|-----|----------------|------|-----|-----------------|------|
| L41 | (12.63, 11.37) | 0,12 | L41 | (73.20, 53.55)  | 0,26 |
| L42 | (10.35, 11.54) | 0,19 | L42 | (69.70, 53.89)  | 0,36 |
| L43 | (12.89, 12.81) | 0,09 | L43 | (68.21, 54.81)  | 0,36 |
| L44 | (12.66, 13.82) | 0,15 | L44 | (66.32, 56.01)  | 0,51 |
| L45 | (13.10, 14.60) | 0,12 | L45 | (62.60, 58.42)  | 0,26 |
| L46 | (11.36, 12.36) | 0,16 | L46 | (61.80, 58.71)  | 0,49 |
| L47 | (14.82, 14.17) | 0,2  | L47 | (57.85, 59.56)  | 0,46 |
| L48 | (15.71, 14.31) | 0,23 | L48 | (54.35, 59.97)  | 0,16 |
| L49 | (17.69, 9.69)  | 0,17 | L49 | (53.67, 60.37)  | 0,41 |
| L50 | (22.95, 10.07) | 0,24 | L50 | (53.44, 61.05)  | 0,11 |
| L51 | (23.51, 10.75) | 0,22 | L51 | (44.04, 58.82)  | 0,49 |
| L52 | (24.50, 11.70) | 0,17 | L52 | (42.73, 61.17)  | 0,51 |
| L53 | (26.02, 12.10) | 0,39 | L53 | (68.84, 75.72)  | 0,51 |
| L54 | (24.96, 12.12) | 0,11 | L54 | (66.78, 77.09)  | 0,46 |
| L55 | (22.83, 11.28) | 0,09 | L55 | (69.99, 79.44)  | 0,26 |
| L56 | (22.18, 9.99)  | 0,3  | L56 | (69.36, 80.36)  | 0,36 |
| L57 | (22.36, 9.57)  | 0,12 | L57 | (67.64, 82.53)  | 0,58 |
| L58 | (24.02, 8.69)  | 0,24 | L58 | (66.27, 82.76)  | 0,36 |
| L59 | (25.76, 8.25)  | 0,14 | L59 | (65.12, 83.10)  | 0,36 |
| L60 | (19.34, 9.15)  | 0,53 | L60 | (62.54, 83.10)  | 0,77 |
| L61 | (18.88, 8.99)  | 0,32 | L61 | (61.45, 83.39)  | 0,57 |
| L62 | (18.82, 8.66)  | 0,26 | L62 | (59.97, 82.93)  | 0,11 |
| L63 | (25.58, 4.03)  | 0,19 | L63 | (58.76, 85.57)  | 0,23 |
| L64 | (24.65, 4.81)  | 0,17 | L64 | (60.37, 85.28)  | 0,11 |
| L65 | (25.63, 5.35)  | 0,11 | L65 | (55.67, 86.48)  | 0,32 |
| L66 | (26.94, 3.69)  | 0,09 | L66 | (88.49, 73.48)  | 0,16 |
| L67 | (29.69, 2.61)  | 0,17 | L67 | (99.37, 68.96)  | 0,11 |
| L68 | (28.24, 3.58)  | 0,19 | L68 | (79.90, 69.59)  | 0,36 |
| L69 | (28.02, 3.36)  | 0,21 | L69 | (78.58, 72.85)  | 0,32 |
| L70 | (28.16, 2.61)  | 0,18 | L70 | (75.72, 75.14)  | 0,32 |
| L71 | (27.97, 1.46)  | 0,24 | L71 | (71.99, 73.14)  | 0,36 |
| L72 | (27.82, 0.87)  | 0,12 | L72 | (79.78, 66.67)  | 0,26 |
| L73 | (29.71, 1.17)  | 0,2  | L73 | (84.77, 65.64)  | 0,32 |
| L74 | (30.89, 1.85)  | 0,17 | L74 | (84.48, 66.27)  | 0,36 |
| L75 | (31.91, 1.81)  | 0,13 | L75 | (89.23, 63.23)  | 0,23 |
| L76 | (31.47, 1.62)  | 0,13 | L76 | (92.10, 62.77)  | 0,23 |
| L77 | (33.22, 1.29)  | 0,17 | L77 | (99.89, 62.43)  | 0,23 |
| L78 | (27.90, 5.45)  | 0,39 | L78 | (100.00, 63.63) | 0,26 |
| L79 | (29.48, 5.08)  | 0,11 | L79 | (98.85, 62.89)  | 0,32 |
| L80 | (29.91, 5.27)  | 0,08 | L80 | (103.49, 61.57) | 0,36 |
| L81 | (30.32, 5.53)  | 0,18 | L81 | (104.75, 60.37) | 0,26 |
| L82 | (30.57, 5.76)  | 0,19 | L82 | (96.91, 56.93)  | 0,32 |
| L83 | (30.30, 9.40)  | 0,11 | L83 | (103.72, 55.38) | 0,36 |
| L84 | (31.93, 10.25) | 0,27 | L84 | (104.18, 52.12) | 0,26 |
| L85 | (30.75, 10.69) | 0,12 | L85 | (152.18, 47.71) | 0,36 |
| L86 | (27.62, 10.40) | 0,23 | L86 | (148.85, 48.34) | 0,41 |
| L87 | (27.83, 11.43) | 0,25 | L87 | (147.25, 44.67) | 0,47 |
| L88 | (32.43, 8.53)  | 0,14 | L88 | (143.47, 43.76) | 0,26 |
| L89 | (33.02, 8.77)  | 0,18 | L89 | (143.41, 41.70) | 0,32 |
| L90 | (30.32, 7.94)  | 0,19 | L90 | (144.10, 40.78) | 0,23 |

|      |                |      |      |                 |      |
|------|----------------|------|------|-----------------|------|
| L91  | (29.05, 7.68)  | 0,18 | L91  | (142.15, 48.74) | 0,26 |
| L92  | (27.93, 8.04)  | 0,17 | L92  | (153.49, 51.72) | 0,26 |
| L93  | (28.46, 8.42)  | 0,32 | L93  | (157.39, 52.29) | 0,26 |
| L94  | (37.50, 8.97)  | 0,13 | L94  | (158.42, 51.72) | 0,26 |
| L95  | (36.07, 8.43)  | 0,25 | L95  | (160.65, 51.09) | 0,34 |
| L96  | (35.85, 6.46)  | 0,27 | L96  | (146.91, 49.77) | 0,16 |
| L97  | (34.76, 4.98)  | 0,13 | L97  | (134.42, 50.80) | 0,16 |
| L98  | (33.74, 4.78)  | 0,31 | L98  | (134.77, 47.65) | 0,41 |
| L99  | (33.74, 7.32)  | 0,15 | L99  | (134.71, 46.39) | 0    |
| L100 | (33.29, 6.99)  | 0,25 | L100 | (138.09, 45.59) | 0,26 |
| L101 | (32.73, 6.73)  | 0,16 | L101 | (134.19, 55.44) | 0,26 |
| L102 | (38.98, 7.73)  | 0,21 | L102 | (132.93, 55.50) | 0,16 |
| L103 | (39.68, 8.07)  | 0,19 | L103 | (133.33, 58.42) | 0,23 |
| L104 | (40.49, 8.18)  | 0,17 | L104 | (142.10, 59.28) | 0,16 |
| L105 | (40.68, 7.25)  | 0,13 | L105 | (145.65, 59.28) | 0,49 |
| L106 | (40.56, 6.41)  | 0,12 | L106 | (169.93, 49.03) | 0,34 |
| L107 | (37.36, 4.88)  | 0,09 | L107 | (168.56, 49.08) | 0,36 |
| L108 | (37.32, 5.13)  | 0,16 | L108 | (165.29, 48.22) | 0,46 |
| L109 | (41.70, 5.99)  | 0,12 | L109 | (174.28, 45.19) | 0,36 |
| L110 | (41.88, 5.18)  | 0,15 | L110 | (176.00, 48.80) | 0,26 |
| L111 | (39.62, 11.97) | 0,23 | L111 | (176.63, 52.81) | 0,23 |
| L112 | (40.72, 12.13) | 0,25 | L112 | (178.35, 53.38) | 0,23 |
| L113 | (41.14, 12.82) | 0,29 | L113 | (178.12, 51.60) | 0,26 |
| L114 | (38.30, 12.81) | 0,13 | L114 | (174.68, 55.04) | 0,34 |
| L115 | (37.70, 12.75) | 0,36 | L115 | (184.82, 58.65) | 0,26 |
| L116 | (37.10, 12.70) | 0,21 | L116 | (184.48, 57.33) | 0,16 |
| L117 | (37.66, 11.53) | 0,24 | L117 | (184.82, 56.99) | 0,16 |
| L118 | (27.95, 17.70) | 0,2  | L118 | (194.62, 54.35) | 0,26 |
| L119 | (33.36, 15.48) | 0,15 | L119 | (197.31, 55.15) | 0,36 |
| L120 | (23.73, 17.68) | 0,24 | L120 | (199.66, 56.59) | 0,23 |
| L121 | (25.08, 18.33) | 0,23 | L121 | (186.43, 61.80) | 0,36 |
| L122 | (25.74, 18.77) | 0,18 | L122 | (185.05, 61.28) | 0,34 |
| L123 | (32.85, 16.95) | 0,24 | L123 | (189.18, 63.69) | 0,34 |
| L124 | (33.56, 17.90) | 0,21 | L124 | (192.33, 64.38) | 0,23 |
| L125 | (32.39, 18.61) | 0,16 | L125 | (194.27, 63.34) | 0,23 |
| L126 | (28.82, 16.13) | 0,37 | L126 | (196.51, 63.46) | 0,26 |
| L127 | (29.71, 15.16) | 0,36 | L127 | (180.47, 63.75) | 0,36 |
| L128 | (27.08, 15.56) | 0,11 | L128 | (171.13, 57.96) | 0,23 |
| L129 | (27.65, 15.09) | 0,18 | L129 | (169.30, 58.25) | 0,26 |
| L130 | (32.15, 14.52) | 0,25 | L130 | (167.24, 58.08) | 0,23 |
| L131 | (32.35, 13.76) | 0,14 | L131 | (159.51, 56.19) | 0,16 |
| L132 | (33.24, 14.23) | 0,13 | L132 | (155.50, 65.06) | 0,26 |
| L133 | (36.44, 16.96) | 0,11 | L133 | (164.60, 63.40) | 0,26 |
| L134 | (37.72, 16.82) | 0,24 | L134 | (130.01, 55.50) | 0,26 |
| L135 | (37.87, 17.44) | 0,19 | L135 | (130.24, 54.47) | 0,26 |
| L136 | (39.74, 17.65) | 0,24 | L136 | (129.32, 50.86) | 0,32 |
| L137 | (39.93, 14.40) | 0,31 | L137 | (128.75, 49.89) | 0,26 |
| L138 | (38.34, 14.31) | 0,27 | L138 | (129.95, 49.08) | 0,16 |
| L139 | (37.18, 14.41) | 0,17 | L139 | (126.63, 53.78) | 0,36 |
| L140 | (37.74, 22.45) | 0,2  | L140 | (124.63, 54.18) | 0,23 |



|      |                |      |      |                 |      |
|------|----------------|------|------|-----------------|------|
| L141 | (38.99, 23.58) | 0,13 | L141 | (123.25, 54.93) | 0,26 |
| L142 | (37.63, 23.83) | 0,26 | L142 | (126.46, 57.90) | 0,26 |
| L143 | (36.42, 23.37) | 0,2  | L143 | (129.90, 59.34) | 0,32 |
| L144 | (34.28, 22.53) | 0,21 | L144 | (139.06, 56.13) | 0,23 |
| L145 | (33.10, 23.05) | 0,19 | L145 | (116.27, 58.99) | 0,23 |
| L146 | (32.77, 23.30) | 0,24 | L146 | (115.18, 58.48) | 0,16 |
| L147 | (31.90, 28.11) | 0,47 | L147 | (112.94, 59.91) | 0,23 |
| L148 | (35.95, 28.59) | 0,14 | L148 | (112.71, 49.31) | 0,26 |
| L149 | (36.78, 29.05) | 0,13 | L149 | (111.45, 49.94) | 0,23 |
| L150 | (36.57, 29.45) | 0,12 | L150 | (111.86, 47.02) | 0,36 |
| L151 | (37.84, 28.35) | 0,23 | L151 | (113.80, 44.73) | 0,16 |
| L152 | (38.91, 27.28) | 0,13 | L152 | (116.95, 39.18) | 0,23 |
| L153 | (39.63, 26.21) | 0,17 | L153 | (118.38, 40.09) | 0,26 |
| L154 | (38.76, 25.79) | 0,23 | L154 | (116.27, 40.84) | 0,26 |
| L155 | (38.61, 25.51) | 0,14 | L155 | (113.06, 37.29) | 0,26 |
| L156 | (37.11, 25.74) | 0,32 | L156 | (41.07, 76.06)  | 0,26 |
| L157 | (40.10, 25.25) | 0,16 | L157 | (47.82, 84.25)  | 0,36 |
| L158 | (35.68, 25.14) | 0,21 | L158 | (49.60, 84.59)  | 0,11 |
| L159 | (35.68, 23.63) | 0,36 | L159 | (46.74, 88.43)  | 0,23 |
| L160 | (35.76, 20.81) | 0,15 | L160 | (31.50, 99.43)  | 0,23 |
| L161 | (35.83, 21.24) | 0,17 | L161 | (35.17, 98.74)  | 0,32 |
| L162 | (35.07, 20.37) | 0,26 | L162 | (34.82, 102.18) | 0,23 |
| L163 | (35.51, 20.14) | 0,13 | L163 | (33.96, 104.41) | 0,16 |
| L164 | (35.15, 19.50) | 0,19 | L164 | (30.64, 104.30) | 0,36 |
| L165 | (33.06, 20.85) | 0,36 | L165 | (44.96, 100.00) | 0,26 |
| L166 | (32.10, 20.41) | 0,16 | L166 | (45.76, 97.37)  | 0,47 |
| L167 | (31.38, 21.91) | 0,19 | L167 | (47.82, 96.56)  | 0,26 |
| L168 | (38.14, 19.04) | 0,17 | L168 | (43.18, 95.59)  | 0,11 |
| L169 | (37.40, 18.85) | 0,17 | L169 | (43.24, 94.27)  | 0,26 |
| L170 | (37.43, 18.26) | 0,24 | L170 | (42.04, 92.90)  | 0,23 |
| L171 | (38.73, 18.94) | 0,2  | L171 | (23.02, 82.53)  | 0,26 |
| L172 | (35.91, 17.59) | 0,23 | L172 | (20.50, 81.96)  | 0,26 |
| L173 | (36.82, 16.08) | 0,08 | L173 | (19.76, 83.10)  | 0,16 |
| L174 | (36.72, 15.41) | 0,09 | L174 | (18.84, 101.37) | 0,47 |
| L175 | (32.80, 15.76) | 0,18 | L175 | (22.22, 102.41) | 0,23 |
| L176 | (34.33, 9.52)  | 0,29 | L176 | (19.99, 104.64) | 0,36 |
| L177 | (35.31, 9.95)  | 0,17 | L177 | (20.10, 105.27) | 0,26 |
| L178 | (36.09, 9.72)  | 0,2  | L178 | (17.81, 105.78) | 0,16 |
| L179 | (38.56, 3.95)  | 0,12 | L179 | (15.81, 105.38) | 0,51 |
| L180 | (39.22, 2.32)  | 0,22 | L180 | (14.83, 105.10) | 0,16 |
| L181 | (37.47, 0.87)  | 0,09 | L181 | (14.55, 103.95) | 0,26 |
| L182 | (37.26, 0.95)  | 0,11 | L182 | (12.26, 102.86) | 0,46 |
| L183 | (35.79, 2.63)  | 0,15 | L183 | (11.00, 102.46) | 0,57 |
| L184 | (41.70, 3.38)  | 0,18 | L184 | (13.92, 109.79) | 0,36 |
| L185 | (42.59, 3.28)  | 0,15 | L185 | (14.78, 109.05) | 0,32 |
| L186 | (41.47, 2.15)  | 0,17 | L186 | (11.11, 107.62) | 0,26 |
| L187 | (42.68, 0.97)  | 0,09 | L187 | (7.39, 111.28)  | 0,36 |
| L188 | (40.51, 3.56)  | 0,12 | L188 | (6.01, 110.08)  | 0,41 |
| L189 | (40.87, 5.09)  | 0,22 | L189 | (5.15, 110.42)  | 0,51 |
| L190 | (41.78, 9.53)  | 0,24 | L190 | (5.27, 113.92)  | 0,26 |

|                |                |             |
|----------------|----------------|-------------|
| L191           | (41.91, 9.86)  | 0,15        |
| L192           | (42.50, 9.80)  | 0,14        |
| L193           | (42.66, 10.66) | 0,19        |
| L194           | (40.37, 9.92)  | 0,16        |
| L195           | (38.02, 8.60)  | 0,16        |
| L196           | (37.45, 8.45)  | 0,11        |
| L197           | (37.65, 8.30)  | 0,09        |
| L198           | (39.86, 7.55)  | 0,11        |
| L199           | (38.69, 5.88)  | 0,17        |
| L200           | (38.22, 5.88)  | 0,33        |
| <b>Average</b> |                | <b>0,19</b> |

|                |                 |             |
|----------------|-----------------|-------------|
| L191           | (2.81, 114.95)  | 0,36        |
| L192           | (2.81, 107.45)  | 0,26        |
| L193           | (2.23, 106.59)  | 0,16        |
| L194           | (4.93, 109.16)  | 0,23        |
| L195           | (29.27, 108.13) | 0,62        |
| L196           | (27.95, 108.02) | 0,32        |
| L197           | (43.81, 104.64) | 0,16        |
| L198           | (43.41, 101.78) | 0,26        |
| L199           | (42.44, 101.60) | 0,41        |
| L200           | (43.07, 98.74)  | 0,23        |
| <b>Average</b> |                 | <b>0,29</b> |

| TN6     |                 |            | TN7     |                |            |
|---------|-----------------|------------|---------|----------------|------------|
| measure | coordinates     | width (μm) | measure | coordinates    | width (μm) |
| L1      | (68.87, 51.89)  | 0,42       | L1      | (12.39, 21.41) | 0,61       |
| L2      | (55.59, 63.50)  | 0,33       | L2      | (10.69, 19.21) | 0,24       |
| L3      | (52.11, 65.80)  | 0,39       | L3      | (12.19, 19.02) | 0,23       |
| L4      | (52.93, 64.21)  | 0,32       | L4      | (12.16, 24.18) | 0,17       |
| L5      | (53.31, 63.47)  | 0,33       | L5      | (12.19, 26.57) | 0,21       |
| L6      | (62.43, 65.44)  | 0,24       | L6      | (11.73, 26.72) | 0,15       |
| L7      | (62.84, 64.43)  | 0,23       | L7      | (12.92, 27.76) | 0,15       |
| L8      | (73.77, 63.64)  | 0,39       | L8      | (18.78, 27.28) | 0,21       |
| L9      | (89.10, 67.41)  | 0,15       | L9      | (20.03, 23.28) | 0,09       |
| L10     | (98.79, 67.63)  | 0,15       | L10     | (21.58, 23.74) | 0,11       |
| L11     | (109.99, 48.14) | 0,2        | L11     | (22.62, 23.33) | 0,2        |
| L12     | (85.60, 6.00)   | 0,12       | L12     | (23.94, 22.43) | 0,23       |
| L13     | (60.90, 9.78)   | 0,12       | L13     | (24.01, 21.39) | 0,11       |
| L14     | (59.97, 11.36)  | 0,2        | L14     | (25.26, 21.78) | 0,08       |
| L15     | (56.74, 9.45)   | 0,44       | L15     | (20.97, 21.94) | 0,12       |
| L16     | (29.22, 2.03)   | 0,23       | L16     | (20.39, 21.01) | 0,23       |
| L17     | (25.33, 41.46)  | 0,27       | L17     | (18.58, 28.92) | 0,13       |
| L18     | (20.97, 43.81)  | 0,11       | L18     | (18.99, 29.11) | 0,11       |
| L19     | (22.97, 45.40)  | 0,33       | L19     | (20.02, 29.16) | 0,13       |
| L20     | (2.98, 47.86)   | 0,27       | L20     | (24.31, 28.45) | 0,19       |
| L21     | (16.70, 69.22)  | 0,35       | L21     | (25.12, 27.56) | 0,17       |
| L22     | (17.14, 70.32)  | 0,15       | L22     | (26.57, 26.79) | 0,18       |
| L23     | (4.68, 70.12)   | 0,28       | L23     | (7.87, 28.86)  | 0,15       |
| L24     | (17.83, 4.46)   | 0,17       | L24     | (7.68, 28.01)  | 0,15       |
| L25     | (88.11, 38.53)  | 0,2        | L25     | (7.27, 27.06)  | 0,11       |
| L26     | (85.13, 38.66)  | 0,16       | L26     | (6.19, 26.22)  | 0,23       |
| L27     | (85.32, 38.12)  | 0,15       | L27     | (6.48, 25.59)  | 0,12       |
| L28     | (85.95, 35.98)  | 0,12       | L28     | (6.66, 27.91)  | 0,21       |
| L29     | (81.08, 42.55)  | 0,16       | L29     | (9.50, 28.36)  | 0,21       |
| L30     | (98.55, 42.93)  | 0,16       | L30     | (9.61, 27.01)  | 0,15       |
| L31     | (108.51, 40.69) | 0,16       | L31     | (9.29, 26.11)  | 0,14       |
| L32     | (103.07, 37.57) | 0,22       | L32     | (8.62, 22.53)  | 0,11       |
| L33     | (103.42, 37.87) | 0,17       | L33     | (7.24, 22.88)  | 0,13       |
| L34     | (101.56, 35.82) | 0,16       | L34     | (6.99, 23.24)  | 0,13       |
| L35     | (101.48, 37.70) | 0,2        | L35     | (7.05, 24.04)  | 0,14       |
| L36     | (101.20, 39.07) | 0,2        | L36     | (6.78, 24.95)  | 0,13       |
| L37     | (100.22, 39.95) | 0,12       | L37     | (5.85, 25.22)  | 0,17       |
| L38     | (100.03, 41.76) | 0,17       | L38     | (7.44, 19.46)  | 0,22       |
| L39     | (100.82, 42.36) | 0,12       | L39     | (7.71, 18.93)  | 0,19       |
| L40     | (96.77, 41.37)  | 0,2        | L40     | (7.70, 18.12)  | 0,16       |

|     |                 |      |     |                |      |
|-----|-----------------|------|-----|----------------|------|
| L41 | (95.26, 37.35)  | 0,23 | L41 | (9.75, 19.46)  | 0,14 |
| L42 | (95.95, 36.55)  | 0,23 | L42 | (10.12, 15.89) | 0,15 |
| L43 | (93.24, 35.13)  | 0,32 | L43 | (10.79, 15.09) | 0,13 |
| L44 | (93.62, 34.23)  | 0,33 | L44 | (11.42, 14.43) | 0,15 |
| L45 | (94.19, 32.50)  | 0,29 | L45 | (9.69, 14.36)  | 0,22 |
| L46 | (93.37, 31.79)  | 0,23 | L46 | (8.18, 15.53)  | 0,09 |
| L47 | (92.25, 31.54)  | 0,23 | L47 | (6.71, 16.32)  | 0,18 |
| L48 | (91.40, 33.38)  | 0,2  | L48 | (3.03, 18.28)  | 0,16 |
| L49 | (90.55, 33.76)  | 0,23 | L49 | (1.97, 15.79)  | 0,15 |
| L50 | (88.80, 33.08)  | 0,5  | L50 | (1.56, 15.41)  | 0,24 |
| L51 | (89.43, 35.38)  | 0,99 | L51 | (1.25, 15.64)  | 0,24 |
| L52 | (90.99, 35.35)  | 0,23 | L52 | (3.55, 15.79)  | 0,16 |
| L53 | (92.25, 37.92)  | 0,32 | L53 | (3.39, 16.16)  | 0,13 |
| L54 | (92.52, 40.00)  | 0,23 | L54 | (4.40, 17.14)  | 0,22 |
| L55 | (92.99, 41.24)  | 0,24 | L55 | (5.03, 17.31)  | 0,13 |
| L56 | (92.22, 42.22)  | 0,24 | L56 | (3.77, 17.29)  | 0,11 |
| L57 | (91.48, 42.72)  | 0,2  | L57 | (3.42, 13.97)  | 0,11 |
| L58 | (90.09, 42.03)  | 0,35 | L58 | (2.78, 14.13)  | 0,18 |
| L59 | (85.60, 42.41)  | 0,4  | L59 | (1.73, 13.55)  | 0,17 |
| L60 | (105.64, 37.79) | 0,45 | L60 | (4.57, 13.15)  | 0,17 |
| L61 | (107.34, 37.27) | 0,33 | L61 | (5.19, 13.40)  | 0,21 |
| L62 | (107.69, 36.23) | 0,17 | L62 | (6.07, 13.76)  | 0,12 |
| L63 | (107.47, 35.08) | 0,39 | L63 | (6.87, 14.05)  | 0,13 |
| L64 | (108.16, 32.67) | 0,27 | L64 | (6.98, 14.33)  | 0,24 |
| L65 | (102.82, 33.71) | 0,23 | L65 | (7.23, 14.66)  | 0,15 |
| L66 | (100.85, 34.99) | 0,2  | L66 | (5.72, 15.55)  | 0,15 |
| L67 | (97.53, 32.94)  | 0,27 | L67 | (3.72, 12.39)  | 0,13 |
| L68 | (83.79, 31.57)  | 0,23 | L68 | (4.20, 11.93)  | 0,09 |
| L69 | (89.21, 28.39)  | 0,29 | L69 | (3.59, 12.12)  | 0,15 |
| L70 | (89.89, 29.30)  | 0,43 | L70 | (1.38, 12.48)  | 0,12 |
| L71 | (89.70, 30.59)  | 0,2  | L71 | (2.26, 11.68)  | 0,12 |
| L72 | (95.26, 29.90)  | 0,23 | L72 | (3.08, 11.15)  | 0,11 |
| L73 | (96.25, 27.35)  | 0,28 | L73 | (4.66, 11.13)  | 0,2  |
| L74 | (96.33, 25.63)  | 0,35 | L74 | (5.92, 10.88)  | 0,11 |
| L75 | (100.90, 27.38) | 0,23 | L75 | (7.23, 12.18)  | 0,26 |
| L76 | (102.82, 28.29) | 0,17 | L76 | (8.09, 12.46)  | 0,13 |
| L77 | (104.11, 27.03) | 0,27 | L77 | (8.70, 12.28)  | 0,13 |
| L78 | (105.12, 24.48) | 0,23 | L78 | (9.55, 12.08)  | 0,12 |
| L79 | (104.71, 24.32) | 0,22 | L79 | (5.25, 9.99)   | 0,17 |
| L80 | (103.94, 24.59) | 0,24 | L80 | (4.71, 9.74)   | 0,18 |
| L81 | (98.90, 24.15)  | 0,24 | L81 | (3.56, 9.95)   | 0,18 |
| L82 | (94.85, 23.47)  | 0,23 | L82 | (3.33, 7.18)   | 0,13 |
| L83 | (94.28, 23.79)  | 0,23 | L83 | (4.55, 7.44)   | 0,21 |
| L84 | (93.48, 24.84)  | 0,29 | L84 | (4.45, 6.99)   | 0,19 |
| L85 | (94.80, 25.38)  | 0,2  | L85 | (4.79, 6.35)   | 0,15 |
| L86 | (93.59, 27.52)  | 0,35 | L86 | (7.51, 6.74)   | 0,16 |
| L87 | (92.61, 29.22)  | 0,27 | L87 | (7.95, 6.38)   | 0,13 |
| L88 | (80.86, 29.13)  | 0,29 | L88 | (8.32, 6.13)   | 0,21 |
| L89 | (81.19, 32.31)  | 0,12 | L89 | (8.88, 6.79)   | 0,12 |
| L90 | (82.39, 34.69)  | 0,17 | L90 | (9.20, 7.33)   | 0,2  |

|      |                |      |      |                |      |
|------|----------------|------|------|----------------|------|
| L91  | (70.29, 34.50) | 0,16 | L91  | (9.82, 8.66)   | 0,26 |
| L92  | (69.44, 34.47) | 0,23 | L92  | (9.09, 4.36)   | 0,2  |
| L93  | (68.78, 33.87) | 0,27 | L93  | (9.56, 3.88)   | 0,13 |
| L94  | (69.28, 35.54) | 0,22 | L94  | (9.61, 5.52)   | 0,17 |
| L95  | (71.27, 35.79) | 0,17 | L95  | (5.33, 4.75)   | 0,2  |
| L96  | (72.12, 35.21) | 0,24 | L96  | (0.78, 5.74)   | 0,16 |
| L97  | (72.73, 34.75) | 0,2  | L97  | (0.38, 4.73)   | 0,13 |
| L98  | (73.16, 29.30) | 0,24 | L98  | (0.80, 3.42)   | 0,17 |
| L99  | (72.89, 27.74) | 0,27 | L99  | (4.77, 1.10)   | 0,11 |
| L100 | (73.74, 26.72) | 0,12 | L100 | (5.36, 1.15)   | 0,15 |
| L101 | (72.01, 27.14) | 0,27 | L101 | (5.84, 3.23)   | 0,17 |
| L102 | (75.60, 25.55) | 0,23 | L102 | (2.81, 2.05)   | 0,12 |
| L103 | (78.01, 27.68) | 0,23 | L103 | (8.12, 1.10)   | 0,19 |
| L104 | (78.12, 29.05) | 0,32 | L104 | (9.02, 1.56)   | 0,13 |
| L105 | (78.56, 31.19) | 0,23 | L105 | (9.66, 2.46)   | 0,11 |
| L106 | (77.46, 33.87) | 0,08 | L106 | (6.60, 1.19)   | 0,25 |
| L107 | (76.70, 35.05) | 0,2  | L107 | (7.24, 3.60)   | 0,29 |
| L108 | (83.71, 35.82) | 0,2  | L108 | (8.11, 4.43)   | 0,13 |
| L109 | (83.32, 35.95) | 0,32 | L109 | (7.22, 4.73)   | 0,24 |
| L110 | (84.91, 34.01) | 0,33 | L110 | (10.89, 2.21)  | 0,12 |
| L111 | (82.28, 24.45) | 0,23 | L111 | (14.00, 3.70)  | 0,15 |
| L112 | (81.41, 23.99) | 0,43 | L112 | (13.50, 3.59)  | 0,22 |
| L113 | (80.39, 24.92) | 0,24 | L113 | (13.17, 4.67)  | 0,24 |
| L114 | (78.59, 24.12) | 0,2  | L114 | (15.23, 0.73)  | 0,15 |
| L115 | (76.04, 24.64) | 0,23 | L115 | (16.42, 2.25)  | 0,29 |
| L116 | (71.96, 25.05) | 0,23 | L116 | (16.72, 5.16)  | 0,17 |
| L117 | (68.24, 25.27) | 0,16 | L117 | (20.85, 3.89)  | 0,19 |
| L118 | (68.87, 26.40) | 0,16 | L118 | (20.45, 4.47)  | 0,17 |
| L119 | (68.10, 27.68) | 0,17 | L119 | (19.71, 4.12)  | 0,16 |
| L120 | (68.32, 29.93) | 0,32 | L120 | (20.36, 3.18)  | 0,11 |
| L121 | (67.88, 31.35) | 0,23 | L121 | (21.47, 2.43)  | 0,17 |
| L122 | (47.89, 33.93) | 0,28 | L122 | (22.58, 1.82)  | 0,13 |
| L123 | (47.18, 33.05) | 0,23 | L123 | (23.59, 2.22)  | 0,21 |
| L124 | (47.10, 32.01) | 0,2  | L124 | (21.28, 1.60)  | 0,17 |
| L125 | (44.50, 31.57) | 0,23 | L125 | (19.27, 2.16)  | 0,21 |
| L126 | (48.41, 28.48) | 0,31 | L126 | (18.58, 2.61)  | 0,23 |
| L127 | (47.48, 27.22) | 0,35 | L127 | (18.09, 2.08)  | 0,15 |
| L128 | (39.43, 29.05) | 0,29 | L128 | (18.20, 4.34)  | 0,12 |
| L129 | (39.13, 32.20) | 0,37 | L129 | (22.75, 4.32)  | 0,19 |
| L130 | (40.11, 32.75) | 0,23 | L130 | (24.61, 1.86)  | 0,19 |
| L131 | (43.45, 35.13) | 0,47 | L131 | (24.42, 1.00)  | 0,2  |
| L132 | (55.17, 32.26) | 0,37 | L132 | (20.87, 0.56)  | 0,23 |
| L133 | (54.85, 32.15) | 0,2  | L133 | (22.90, 6.37)  | 0,31 |
| L134 | (54.93, 31.30) | 0,2  | L134 | (20.98, 6.45)  | 0,15 |
| L135 | (54.49, 31.49) | 0,24 | L135 | (20.10, 6.16)  | 0,25 |
| L136 | (53.94, 31.90) | 0,29 | L136 | (18.70, 6.17)  | 0,11 |
| L137 | (52.90, 32.39) | 0,27 | L137 | (17.65, 7.86)  | 0,21 |
| L138 | (52.57, 31.82) | 0,24 | L138 | (17.07, 10.50) | 0,19 |
| L139 | (51.40, 31.08) | 0,17 | L139 | (17.57, 11.15) | 0,19 |
| L140 | (50.22, 31.46) | 0,35 | L140 | (20.35, 10.74) | 0,3  |



|      |                |      |      |                |      |
|------|----------------|------|------|----------------|------|
| L141 | (49.04, 31.79) | 0,17 | L141 | (19.26, 11.11) | 0,2  |
| L142 | (48.93, 33.02) | 0,23 | L142 | (19.81, 12.49) | 0,4  |
| L143 | (49.04, 35.13) | 0,28 | L143 | (19.32, 12.19) | 0,35 |
| L144 | (47.01, 36.09) | 0,16 | L144 | (17.88, 12.38) | 0,22 |
| L145 | (46.58, 35.73) | 0,17 | L145 | (17.47, 13.77) | 0,31 |
| L146 | (45.56, 36.25) | 0,24 | L146 | (17.19, 13.01) | 0,13 |
| L147 | (51.56, 20.81) | 0,27 | L147 | (16.11, 14.55) | 0,23 |
| L148 | (51.67, 21.82) | 0,23 | L148 | (17.06, 14.99) | 0,21 |
| L149 | (50.33, 21.47) | 0,15 | L149 | (18.49, 15.20) | 0,23 |
| L150 | (49.21, 23.06) | 0,4  | L150 | (20.82, 14.82) | 0,15 |
| L151 | (48.68, 21.85) | 0,15 | L151 | (21.90, 14.53) | 0,09 |
| L152 | (49.31, 21.33) | 0,17 | L152 | (22.47, 14.79) | 0,11 |
| L153 | (52.87, 19.82) | 0,2  | L153 | (20.59, 13.11) | 0,15 |
| L154 | (52.98, 23.36) | 0,32 | L154 | (20.74, 12.79) | 0,16 |
| L155 | (47.15, 24.92) | 0,22 | L155 | (23.37, 13.10) | 0,24 |
| L156 | (45.97, 24.32) | 0,27 | L156 | (24.24, 14.25) | 0,18 |
| L157 | (45.32, 23.69) | 0,17 | L157 | (23.50, 16.06) | 0,12 |
| L158 | (44.30, 22.67) | 0,24 | L158 | (22.96, 16.05) | 0,19 |
| L159 | (42.88, 22.95) | 0,24 | L159 | (22.28, 18.02) | 0,19 |
| L160 | (42.14, 21.96) | 0,23 | L160 | (23.58, 18.20) | 0,15 |
| L161 | (42.77, 20.04) | 0,24 | L161 | (23.91, 19.06) | 0,23 |
| L162 | (43.62, 18.67) | 0,27 | L162 | (23.63, 19.56) | 0,12 |
| L163 | (44.66, 20.70) | 0,2  | L163 | (23.54, 19.74) | 0,14 |
| L164 | (39.76, 21.00) | 0,38 | L164 | (23.17, 20.14) | 0,19 |
| L165 | (39.62, 20.21) | 0,27 | L165 | (21.63, 18.37) | 0,14 |
| L166 | (37.68, 21.00) | 0,35 | L166 | (18.63, 18.17) | 0,2  |
| L167 | (37.90, 22.48) | 0,27 | L167 | (17.26, 20.30) | 0,12 |
| L168 | (36.17, 22.67) | 0,2  | L168 | (15.96, 19.92) | 0,15 |
| L169 | (39.70, 24.62) | 0,2  | L169 | (15.18, 20.70) | 0,16 |
| L170 | (39.35, 24.10) | 0,37 | L170 | (15.88, 20.94) | 0,15 |
| L171 | (41.48, 23.90) | 0,32 | L171 | (19.50, 22.30) | 0,12 |
| L172 | (42.58, 24.97) | 0,29 | L172 | (18.87, 23.34) | 0,18 |
| L173 | (43.78, 25.33) | 0,32 | L173 | (19.50, 24.11) | 0,12 |
| L174 | (45.23, 26.40) | 0,24 | L174 | (21.29, 24.53) | 0,15 |
| L175 | (51.12, 26.12) | 0,27 | L175 | (21.34, 24.94) | 0,12 |
| L176 | (52.96, 25.79) | 0,24 | L176 | (19.57, 25.74) | 0,36 |
| L177 | (53.94, 26.29) | 0,22 | L177 | (17.44, 25.12) | 0,3  |
| L178 | (53.01, 24.86) | 0,31 | L178 | (16.87, 25.44) | 0,13 |
| L179 | (52.38, 24.18) | 0,23 | L179 | (16.50, 25.51) | 0,08 |
| L180 | (56.43, 24.04) | 0,27 | L180 | (14.42, 23.13) | 0,39 |
| L181 | (57.83, 23.47) | 0,2  | L181 | (3.35, 25.89)  | 0,31 |
| L182 | (56.84, 22.56) | 0,22 | L182 | (3.07, 25.41)  | 0,21 |
| L183 | (54.87, 21.60) | 0,27 | L183 | (4.31, 25.34)  | 0,09 |
| L184 | (56.57, 21.25) | 0,24 | L184 | (4.33, 26.41)  | 0,16 |
| L185 | (57.53, 21.93) | 0,32 | L185 | (3.88, 26.43)  | 0,25 |
| L186 | (58.87, 21.30) | 0,31 | L186 | (1.08, 26.65)  | 0,15 |
| L187 | (59.42, 22.04) | 0,35 | L187 | (0.53, 26.74)  | 0,22 |
| L188 | (60.65, 22.86) | 0,32 | L188 | (0.50, 23.87)  | 0,19 |
| L189 | (61.09, 21.11) | 0,28 | L189 | (3.05, 23.87)  | 0,17 |
| L190 | (58.10, 26.23) | 0,24 | L190 | (2.81, 24.35)  | 0,15 |

|                |                |             |                |               |             |
|----------------|----------------|-------------|----------------|---------------|-------------|
| L191           | (60.13, 26.72) | 0,15        | L191           | (4.29, 21.43) | 0,21        |
| L192           | (63.17, 27.71) | 0,16        | L192           | (5.29, 21.72) | 0,23        |
| L193           | (63.77, 28.34) | 0,23        | L193           | (4.48, 19.80) | 0,18        |
| L194           | (62.92, 29.82) | 0,44        | L194           | (6.92, 21.74) | 0,2         |
| L195           | (64.07, 31.63) | 0,2         | L195           | (1.29, 21.13) | 0,15        |
| L196           | (61.66, 31.22) | 0,11        | L196           | (1.45, 20.97) | 0,13        |
| L197           | (57.34, 32.53) | 0,24        | L197           | (0.81, 20.42) | 0,19        |
| L198           | (52.76, 30.78) | 0,2         | L198           | (0.31, 20.31) | 0,19        |
| L199           | (49.83, 29.65) | 0,35        | L199           | (1.51, 19.85) | 0,23        |
| L200           | (49.40, 29.16) | 0,23        | L200           | (29.82, 3.44) | 0,11        |
| <b>Average</b> |                | <b>0,25</b> | <b>Average</b> |               | <b>0,18</b> |

| TN8     |              |            |
|---------|--------------|------------|
| measure | coordinates  | width (μm) |
| L2      | (3,74, 2,97) | 0,46       |
| L4      | (3,40, 2,66) | 0,12       |
| L6      | (4,30, 2,67) | 0,12       |
| L8      | (4,14, 2,23) | 0,15       |
| L10     | (4,25, 2,46) | 0,07       |
| L12     | (3,70, 1,39) | 0,22       |
| L14     | (1,97, 2,35) | 0,32       |
| L16     | (1,06, 1,86) | 0,25       |
| L18     | (1,56, 2,00) | 0,24       |
| L20     | (1,32, 1,07) | 0,27       |
| L22     | (0,66, 1,45) | 0,22       |
| L24     | (1,82, 1,00) | 0,17       |
| L26     | (1,57, 1,15) | 0,07       |
| L28     | (2,72, 1,18) | 0,28       |
| L30     | (4,68, 3,58) | 0,12       |
| L2      | (2,48, 1,72) | 0,12       |
| L4      | (1,55, 2,07) | 0,14       |
| L6      | (1,71, 2,23) | 0,25       |
| L2      | (1,64, 1,76) | 0,11       |
| L4      | (1,82, 1,99) | 0,11       |
| L6      | (2,56, 1,59) | 0,13       |
| L8      | (1,56, 0,69) | 0,09       |
| L10     | (3,61, 0,58) | 0,32       |
| L12     | (3,03, 1,48) | 0,12       |
| L14     | (2,42, 2,54) | 0,1        |
| L16     | (3,00, 2,32) | 0,14       |
| L18     | (1,91, 2,61) | 0,13       |
| L20     | (2,45, 2,09) | 0,18       |
| L22     | (3,34, 2,14) | 0,15       |
| L24     | (3,24, 1,94) | 0,12       |
| L26     | (4,76, 1,23) | 0,19       |
| L28     | (4,52, 1,84) | 0,21       |
| L30     | (3,87, 2,66) | 0,12       |
| L32     | (4,28, 3,02) | 0,13       |
| L34     | (5,00, 2,70) | 0,24       |
| L2      | (2,35, 2,92) | 0,15       |
| L4      | (1,34, 1,17) | 0,16       |
| L6      | (1,02, 1,66) | 0,09       |
| L8      | (1,17, 1,95) | 0,11       |
| L10     | (1,96, 1,52) | 0,12       |

|     |                |      |
|-----|----------------|------|
| L12 | (3,04, 1,67)   | 0,26 |
| L14 | (2,51, 2,60)   | 0,12 |
| L16 | (3,94, 2,12)   | 0,12 |
| L18 | (3,18, 0,88)   | 0,09 |
| L20 | (3,00, 0,73)   | 0,11 |
| L22 | (2,63, 0,69)   | 0,13 |
| L24 | (2,17, 1,16)   | 0,11 |
| L26 | (0,91, 0,77)   | 0,24 |
| L2  | (1,71, 1,50)   | 0,14 |
| L2  | (3,69, 2,72)   | 0,11 |
| L4  | (3,08, 2,19)   | 0,14 |
| L6  | (2,96, 1,97)   | 0,13 |
| L8  | (2,41, 2,39)   | 0,14 |
| L10 | (1,45, 1,90)   | 0,11 |
| L12 | (1,57, 2,09)   | 0,11 |
| L14 | (2,77, 2,87)   | 0,1  |
| L16 | (2,03, 2,78)   | 0,11 |
| L18 | (1,58, 0,49)   | 0,1  |
| L20 | (2,14, 2,16)   | 0,18 |
| L22 | (1,67, 2,70)   | 0,16 |
| L24 | (3,37, 0,54)   | 0,22 |
| L26 | (4,18, 2,21)   | 0,17 |
| L2  | (1,52, 1,34)   | 0,17 |
| L4  | (1,91, 1,27)   | 0,24 |
| L6  | (2,09, 0,58)   | 0,18 |
| L10 | (12,82, 5,32)  | 0,16 |
| L26 | (6,10, 11,38)  | 0,14 |
| L34 | (1,86, 7,34)   | 0,15 |
| L42 | (7,29, 1,59)   | 0,29 |
| L46 | (10,56, 2,04)  | 0,24 |
| L50 | (13,00, 1,88)  | 0,11 |
| L54 | (11,66, 3,18)  | 0,18 |
| L58 | (10,99, 2,99)  | 0,22 |
| L60 | (15,26, 4,09)  | 0,19 |
| L62 | (14,30, 2,27)  | 0,16 |
| L64 | (15,66, 2,66)  | 0,09 |
| L66 | (17,19, 4,80)  | 0,13 |
| L68 | (16,72, 3,78)  | 0,13 |
| L70 | (17,65, 4,02)  | 0,14 |
| L72 | (18,52, 1,79)  | 0,1  |
| L74 | (18,44, 5,70)  | 0,18 |
| L76 | (19,15, 6,95)  | 0,17 |
| L78 | (18,95, 7,17)  | 0,15 |
| L80 | (12,88, 11,60) | 0,17 |
| L82 | (12,29, 11,46) | 0,31 |
| L84 | (10,61, 11,56) | 0,29 |
| L86 | (9,44, 12,45)  | 0,28 |
| L88 | (8,58, 11,82)  | 0,24 |
| L90 | (9,99, 14,89)  | 0,11 |
| L92 | (14,39, 13,33) | 0,12 |

|      |               |      |
|------|---------------|------|
| L94  | (11,25, 3,77) | 0,15 |
| L96  | (5,30, 7,49)  | 0,38 |
| L98  | (8,35, 8,86)  | 0,2  |
| L100 | (8,78, 8,64)  | 0,1  |
| L102 | (6,65, 11,07) | 0,11 |
| L2   | (5,18, 2,39)  | 0,12 |
| L4   | (3,18, 1,46)  | 0,15 |
| L6   | (1,97, 0,55)  | 0,22 |
| L8   | (4,87, 1,57)  | 0,14 |
| L10  | (6,08, 1,38)  | 0,11 |
| L12  | (6,66, 1,34)  | 0,19 |
| L14  | (6,87, 2,42)  | 0,21 |
| L16  | (1,48, 5,47)  | 0,17 |
| L18  | (1,69, 6,14)  | 0,09 |
| L20  | (1,10, 6,47)  | 0,16 |
| L22  | (1,25, 7,23)  | 0,08 |
| L24  | (6,11, 6,33)  | 0,17 |
| L26  | (6,77, 5,18)  | 0,14 |
| L28  | (8,19, 5,89)  | 0,13 |
| L30  | (8,34, 5,83)  | 0,11 |
| L32  | (8,81, 6,05)  | 0,18 |
| L34  | (8,21, 7,38)  | 0,21 |
| L36  | (8,28, 7,04)  | 0,17 |
| L38  | (12,06, 6,43) | 0,17 |
| L40  | (11,74, 7,27) | 0,23 |
| L42  | (11,56, 7,11) | 0,17 |
| L44  | (9,11, 7,81)  | 0,22 |
| L46  | (7,79, 4,75)  | 0,29 |
| L48  | (6,84, 4,01)  | 0,18 |
| L50  | (1,77, 4,72)  | 0,15 |
| L52  | (1,01, 3,85)  | 0,13 |
| L54  | (2,79, 5,69)  | 0,16 |
| L56  | (3,51, 5,17)  | 0,13 |
| L58  | (2,92, 6,38)  | 0,13 |
| L60  | (0,15, 1,96)  | 0,07 |
| L62  | (9,30, 2,54)  | 0,13 |
| L64  | (8,70, 3,03)  | 0,11 |
| L66  | (5,77, 0,38)  | 0,16 |
| L68  | (2,95, 0,88)  | 0,31 |
| L70  | (0,63, 2,50)  | 0,16 |
| L72  | (1,44, 2,53)  | 0,15 |
| L74  | (3,40, 3,31)  | 0,1  |
| L76  | (11,33, 1,28) | 0,17 |
| L78  | (11,10, 6,17) | 0,19 |
| L80  | (10,42, 6,47) | 0,1  |
| L82  | (9,27, 7,12)  | 0,22 |
| L84  | (6,99, 5,74)  | 0,16 |
| L86  | (1,78, 7,79)  | 0,14 |
| L2   | (5,02, 2,96)  | 0,22 |
| L4   | (2,49, 1,42)  | 0,1  |



|     |                |      |
|-----|----------------|------|
| L6  | (5,27, 1,01)   | 0,09 |
| L8  | (2,02, 6,72)   | 0,12 |
| L10 | (1,38, 6,61)   | 0,13 |
| L12 | (8,82, 5,44)   | 0,19 |
| L14 | (4,60, 7,34)   | 0,14 |
| L16 | (4,73, 7,58)   | 0,12 |
| L18 | (3,89, 1,85)   | 0,07 |
| L2  | (7,49, 5,70)   | 0,09 |
| L4  | (5,97, 5,33)   | 0,11 |
| L6  | (5,04, 5,76)   | 0,18 |
| L8  | (5,70, 4,05)   | 0,15 |
| L10 | (3,44, 1,85)   | 0,1  |
| L12 | (4,63, 3,99)   | 0,12 |
| L14 | (5,31, 3,94)   | 0,18 |
| L16 | (4,22, 2,99)   | 0,24 |
| L18 | (1,44, 2,31)   | 0,1  |
| L20 | (7,11, 2,17)   | 0,17 |
| L22 | (4,79, 0,82)   | 0,2  |
| L24 | (1,89, 4,68)   | 0,33 |
| L26 | (1,03, 4,86)   | 0,19 |
| L28 | (2,30, 0,52)   | 0,13 |
| L30 | (4,89, 2,49)   | 0,21 |
| L32 | (6,40, 2,65)   | 0,07 |
| L2  | (5,03, 2,31)   | 0,18 |
| L4  | (5,69, 3,62)   | 0,3  |
| L6  | (2,24, 2,80)   | 0,13 |
| L8  | (1,71, 2,47)   | 0,32 |
| L10 | (1,61, 4,19)   | 0,12 |
| L12 | (0,98, 4,24)   | 0,14 |
| L14 | (1,17, 2,37)   | 0,16 |
| L16 | (1,82, 1,20)   | 0,19 |
| L18 | (3,51, 0,86)   | 0,16 |
| L24 | (5,83, 11,15)  | 0,22 |
| L56 | (36.61, 29.16) | 0,46 |
| L57 | (46.42, 33.28) | 0,12 |
| L58 | (7.32, 37.39)  | 0,12 |
| L59 | (6.79, 38.27)  | 0,15 |
| L60 | (5.19, 33.28)  | 0,07 |
| L61 | (8.73, 31.77)  | 0,22 |
| L62 | (13.85, 30.49) | 0,32 |
| L63 | (12.91, 30.69) | 0,25 |
| L64 | (2.70, 28.81)  | 0,24 |
| L65 | (3.17, 26.30)  | 0,27 |
| L66 | (3.05, 23.74)  | 0,22 |
| L67 | (3.97, 20.97)  | 0,17 |
| L68 | (4.89, 22.29)  | 0,07 |
| L69 | (11.55, 21.28) | 0,28 |
| L70 | (13.75, 17.98) | 0,12 |
| L71 | (7.18, 7.81)   | 0,12 |
| L72 | (13.95, 5.94)  | 0,14 |

|                |                |             |
|----------------|----------------|-------------|
| L73            | (19.93, 1.19)  | 0,25        |
| L74            | (17.65, 1.77)  | 0,11        |
| L75            | (23.00, 2.72)  | 0,11        |
| L76            | (1.42, 8.04)   | 0,13        |
| L77            | (20.95, 7.22)  | 0,09        |
| L78            | (19.58, 14.52) | 0,32        |
| L79            | (5.50, 14.56)  | 0,12        |
| L80            | (13.30, 28.08) | 0,1         |
| L81            | (23.80, 23.29) | 0,14        |
| L83            | (26.10, 31.49) | 0,18        |
| <b>Average</b> |                | <b>0,16</b> |
